# Supplementary material for: SerpinB3 Upregulates Low-Density Lipoprotein Receptor-Related Protein (LRP) Family Members, Leading to Wnt Signaling Activation and Increased Cell Survival and Invasiveness
Source: MDPI journal article supplement (doi:10.3390/biology12060771), 2023-05-26
Supplement: s1 [file s1]

## SUPPLEMENTARY TABLES

**TABLE S1.** List of the antibodies used in the study

| Antibody                              | PROCEDURE            | Dilution    | Supplier                                      |
|---------------------------------------|----------------------|-------------|-----------------------------------------------|
| anti-LRP-1 85k Da                     | IF                   | 1:50        | Meridian Life Sciece, Inc, Memphis, USA       |
| anti-LRP-1 85k Da                     | WB                   | 5 µg/ml     | Meridian Life Sciece, Inc, Memphis, USA       |
| Anti-LRP-1 515 kDa                    | Blocking experiments | 0.5-5 µg/ml | Meridian Life Sciece, Inc, Memphis, USA       |
| Anti-LRP-5                            | IF                   | 1 ug/ml     | BD Bioscience, Franklin Lakes, NJ, USA        |
| Anti-LRP-6                            | IF                   | 1:1000      | Cell Signaling, Danvers, MA, USA              |
| anti-SERPINB3                         | IF                   | 8 µg/ml     | Hepa-Ab, Xeptagen S.p.A., Marghera, VE, Italy |
| anti-vimentin                         | IF                   | 1:1000      | GeneTex, Alton Parkway Irvine, CA, USA        |
| anti-vimentin                         | WB                   | 1:3000      | GeneTex, Alton Parkway Irvine, CA, USA        |
| anti-E-cadherin                       | IF                   | 1:1000      | BD Bioscience, Franklin Lakes, NJ, USA        |
| anti-E-cadherin                       | WB                   | 1:3000      | BD Bioscience, Franklin Lakes, NJ, USA        |
| Alexa Fluor® 488 Goat Anti-Mouse IgG  | IF                   | 1:500       | Invitrogen Life Technologies, NY, USA         |
| Alexa Fluor® 546 Goat Anti-Rabbit IgG | IF                   | 1:500       | Invitrogen Life Technologies, NY, USA         |
| anti-mouse IgG Peroxidase conjugated  | WB                   | 1:1000      | Sigma-Aldrich, St. Louis, MO, USA             |
| anti-rabbit IgG Peroxidase conjugated | WB                   | 1:1000      | Sigma-Aldrich, St. Louis, MO, USA             |

WB: Western blot; IF: immunofluorescence

**TABLE S2.** List of the primers used in the study.

| Target           | Orientation | Sequence (5' to 3')      |
|------------------|-------------|--------------------------|
| CD274            | Sense       | TTGCTGAACGCCCCATACAA     |
|                  | Antisense   | GGAATTGGTGGTGGTGGTCT     |
| SerpinB3         | Sense       | GCAAATGCTCCAGAAGAAAG     |
|                  | Antisense   | CGAGGCCAAAATGAAAAGATG    |
| Wnt-1            | Sense       | CAAACAGCGGCGTCTGATAC     |
|                  | Antisense   | AGCCTCGGTTGACGATCTTG     |
| Wnt-7a           | Sense       | AACTTGCACAACAACGAGGC     |
|                  | Antisense   | TTGTCCTTGAGCACGTAGCC     |
| cMyc             | Sense       | AAGACAGCGGCAGCCCGAAC     |
|                  | Antisense   | TGGGCGAGCTGCTGTCGTTG     |
| $\beta$ -catenin | Sense       | TGGTGCCCAGGGAGAACCCC     |
|                  | Antisense   | TGTCACCTGGAGGCAGCCCA     |
| Axin             | Sense       | AACGACAGCGAGCAGCAGAG     |
|                  | Antisense   | AGCTTGTGACACGGCCCTGG     |
| LRP-1            | Sense       | AGCAAACGAGGCCTAAGTCA     |
|                  | Antisense   | GCTGCTTGTGCTGATGGTAA     |
| GAPDH            | Sense       | TGGTATCGTGGAAGGACTCATGAC |
|                  | Antisense   | ATGCCAGTGAGCTTCCCGTTCAGC |

**TABLE S3.** Clinical and histological characteristics of the patients included in the study.

|                                     |                |
|-------------------------------------|----------------|
| <b>Number of patients:</b>          | <b>38</b>      |
| Age (mean years $\pm$ SD)           | 62,7 $\pm$ 9,5 |
| Male sexex (%)                      | 29/38 (76,3%)  |
| <b>Etiology</b>                     |                |
| HBV infection                       | 7/38 (18,4%)   |
| HCV infection                       | 17/38 (44,7%)  |
| HBV+HCV infection                   | 3/38 (7,9%)    |
| Alcohol use                         | 12/38 (31,6%)  |
| Other                               | 5/38 (11.1%)   |
| <b>Pathology</b>                    |                |
| Number of nodules (min-max)         | 1,44 (1-3)     |
| Nodule diameter mean – mm (min-max) | 54,55 (7-190)  |
| Vascular invasion                   | 19 (50,00%)    |
| - Microscopic                       | 18 (47,37%)    |
| - Macroscopic                       | 1 (2,63%)      |
| <b>Grading</b>                      |                |
| GI                                  | 3 (7,9 %)      |
| GII                                 | 21 (55,26%)    |
| GIII                                | 14 (36,84%)    |

## SUPPLEMENTARY FIGURES

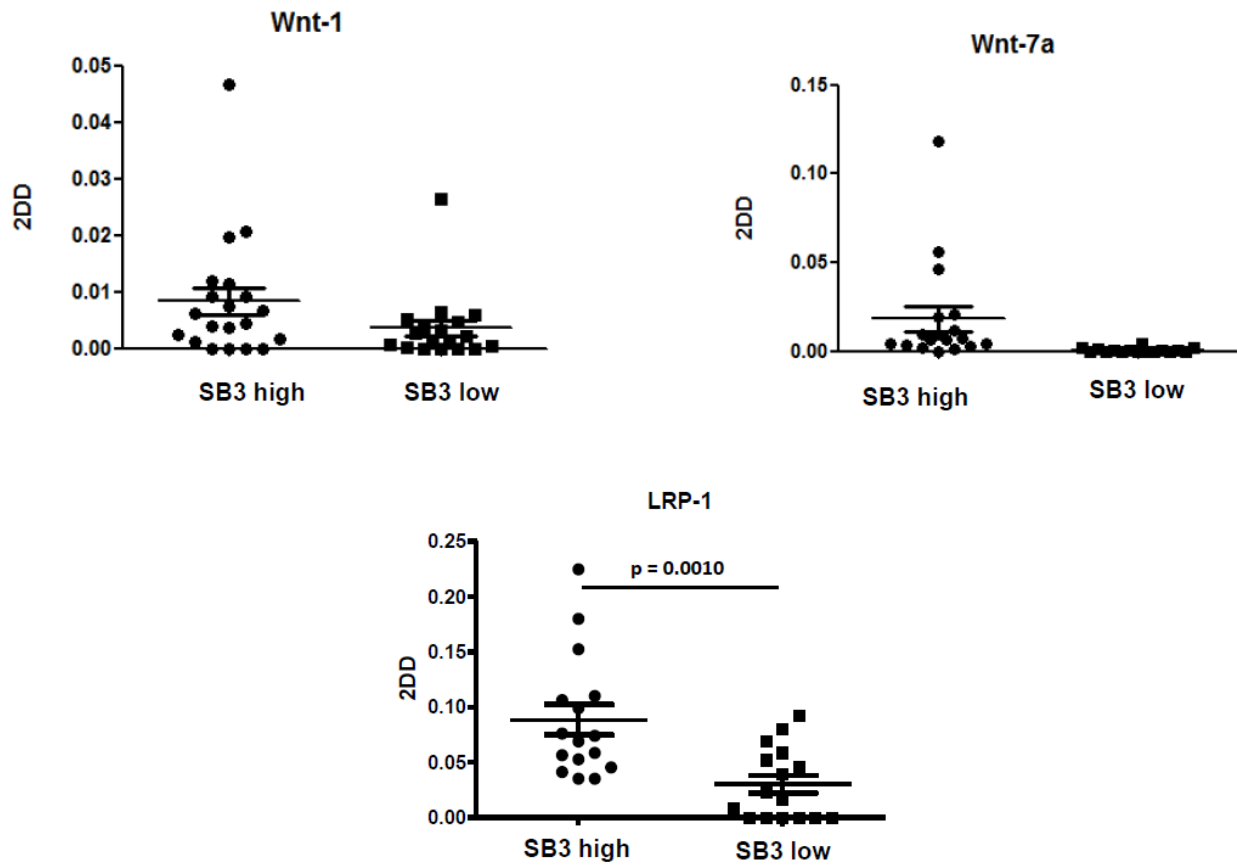

**Figure S1 Relative mRNA expression of SerpinB3 compared with Wnt-1, Wnt-7a and LPR-1 in human HCCs.** The expression of Wnt-1, Wnt-7a and of LPR-1 was evaluated in 38 tumor specimens from HCC patients, grouped on the basis of the expression of SB3, where high is  $\geq$  median value and low is  $<$  median value. Experiments were performed in triplicate and data were expressed as mean  $\pm$  SD (vertical bars).

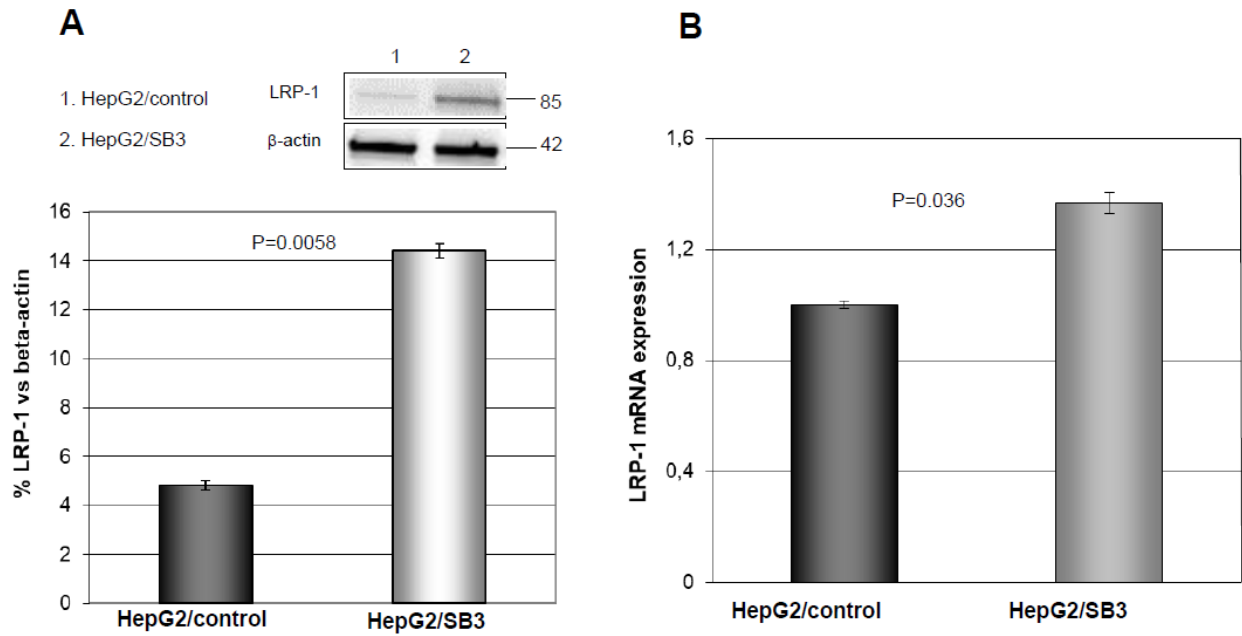

**Figure S2 LRP-1 expression in hepatoma cells.** A): example of densitometric analysis of Western blot results for LRP-1 protein, normalized to  $\beta$ -actin and the cropped blots of LRP-1 and of the housekeeping  $\beta$ -actin. B): relative LRP-1 mRNA expression in HepG2/SerpinB3 cells. Results are expressed as fold change ( $2^{-\Delta\Delta C_t}$ ) compared to control cells (HepG2/empty vector). Experiments were performed in triplicate and data were expressed as mean  $\pm$  SD (vertical bars).

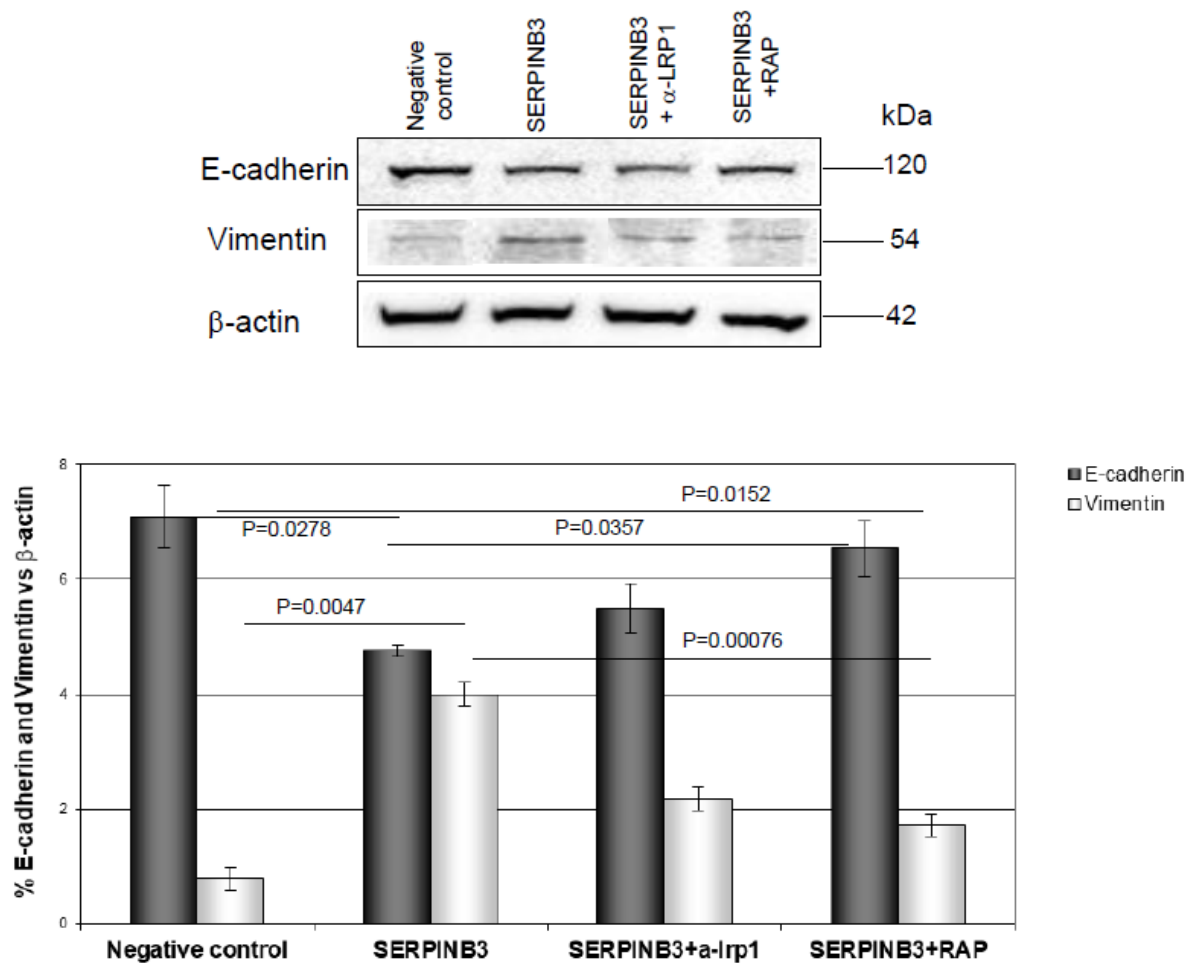

**Figure S3 Western blot analysis of E-cadherin and vimentin.** Upper panel: example of cropped immunoblot of E-cadherin, vimentin and of the housekeeping  $\beta$ -actin. Samples were loaded in the same gel and run under the same experimental conditions. Lower panel: histogram of quantitative densitometric analysis of the intensity of E-cadherin and vimentin bands, normalized to  $\beta$ -actin obtained in HepG2/empty vector cells incubated overnight with PBS, as negative control, with 100 ng/ml of recombinant SERPINB3 protein, as positive control. Cells were pre-treated with 5  $\mu$ g/ml of anti-LRP antibody for 1 hour or overnight incubated with 5  $\mu$ g/ml of RAP before treatment with 100ng/ml of recombinant SerpinB3. Experiments were performed in triplicate. Data were expressed as mean  $\pm$  SD (vertical bars).
